# Supplementary material for: Semitransparent polymer solar cells floating on water: selected transmission windows and active control of algal growth
Source: Royal Society of Chemistry journal article supplement (doi:10.1039/d1tc03110d), 2021-01-01
Supplement: d1tc03110d1.pdf [file d1tc03110d1.pdf]

## Electronic Supplementary Information (ESI)

### Semitransparent Polymer Solar Cells Floating on Water: Selected Transmission Windows and Active Control of Algal Growth

Luqi Yin,<sup>a</sup> Yao Zhou,<sup>b</sup> Tong Jiang,<sup>b</sup> Yunxiang Xu,<sup>a</sup> Tong Liu,<sup>a</sup> Na Li,<sup>a</sup> Ke Zhou,<sup>\*,c</sup>

Liangmin Yu,<sup>d,e</sup> Cui Guo,<sup>\*,b</sup> Petri Murto,<sup>f</sup> & Xiaofeng Xu<sup>\*,a</sup>

<sup>a</sup> College of Materials Science and Engineering, Ocean University of China, Qingdao 266100, China.

<sup>b</sup> College of Marine Life Science, Institute of Evolution and Marine Biodiversity, Ocean University of China, Qingdao 266003, China.

<sup>c</sup> State Key Laboratory for Mechanical Behavior of Materials, Xi'an Jiaotong University, Xi'an 710049, China.

<sup>d</sup> Key Laboratory of Marine Chemistry Theory and Technology, Ministry of Education, Ocean University of China, Qingdao 266100, China.

<sup>e</sup> Open Studio for Marine Corrosion and Protection, Pilot National Laboratory for Marine Science and Technology, Qingdao 266237, China.

<sup>f</sup> Department of Chemistry, University of Cambridge, Cambridge CB2 1EW, United Kingdom.

\* Corresponding authors: X. Xu, email: xuxiaofeng@ouc.edu.cn

C. Guo, email: guocui@ouc.edu.cn

K. Zhou, email: msekzhou@mail.xjtu.edu.cn

## Table of Contents

|                                                                                  |     |
|----------------------------------------------------------------------------------|-----|
| 1. Materials .....                                                               | S2  |
| 2. Absorbance of materials .....                                                 | S3  |
| 3. Device structures of PSCs .....                                               | S3  |
| 4. $J-V$ and EQE characterization.....                                           | S4  |
| 5. Exciton dissociation characterization .....                                   | S4  |
| 6. Space charge limited current (SCLC) mobility measurements .....               | S5  |
| 7. Charge recombination characterization .....                                   | S7  |
| 8. $J-V$ curves of large-area PSCs .....                                         | S7  |
| 9. CIE chromaticity diagram.....                                                 | S8  |
| 10. Absorption spectra of photosynthetic pigments .....                          | S8  |
| 11. Absorption spectrum of photosynthetic pigments in <i>Chlorella sp.</i> ..... | S9  |
| 12. Summary of photosynthetic parameters .....                                   | S9  |
| 13. Flow cytometric dot-plots of <i>Synechococcus</i> .....                      | S10 |
| 14. $J-V$ curves of integrated ST-PSCs .....                                     | S10 |

## 1. Materials

The donor polymer PBDB-TF-T10 was prepared according to the previous literature.<sup>1</sup> The small-molecule acceptor Y6 were purchased from Solarmer Energy, Inc. The four algae (*Chlorella sp.*, *A. carterae* and *P. tricornutum* and *Synechococcus*) were cultivated in the labs of College of Marine Life Science, Ocean University of China.

## 2. Absorbance of materials

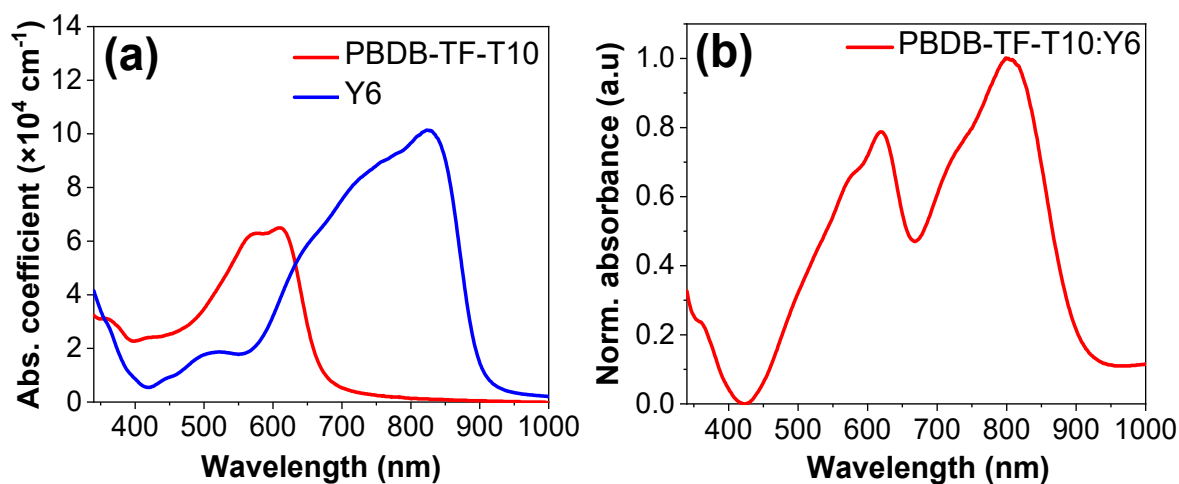

**Figure S1.** (a) Absorption coefficients of the donor and acceptor in thin films; (b) normalized absorbance of the blend film.

UV-Vis-NIR absorption spectra were measured with a SHIMADZU UV2600 UV-Vis absorption spectrometer.

### 3. Device structures of PSCs

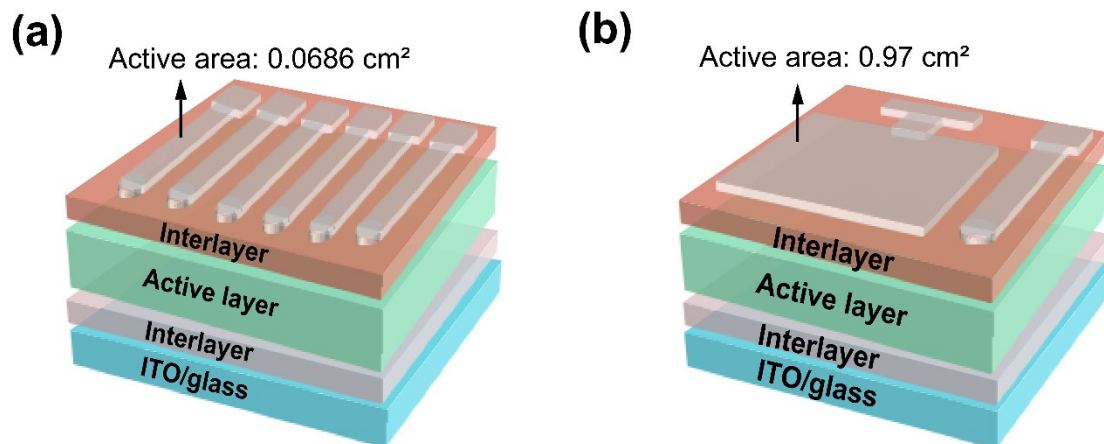

**Figure S2.** Device structures of (a) small-area and (b) large-area PSCs.

### 4. $J-V$ and EQE characterization

All  $J-V$  curves of PSCs were recorded in backward scan direction by using a Keithley 2400 source meter under a solar simulator (Oriel Sol3A, 69920, Newport) with simulated AM1.5G illumination at 100 mW/cm<sup>2</sup>. The intensity of light was calibrated by using a Si-based power meter (PT-SI-SRC, Pharos). For the EQE measurements, the photocurrent was measured by using a Keithley 485 picoammeter under monochromatic light (MS257) illumination across the PSCs. The current was recorded as the voltage over a 50  $\Omega$  resistance and converted to a EQE profile by comparing the data with a calibrated Si reference cell.

## 5. Exciton dissociation characterization

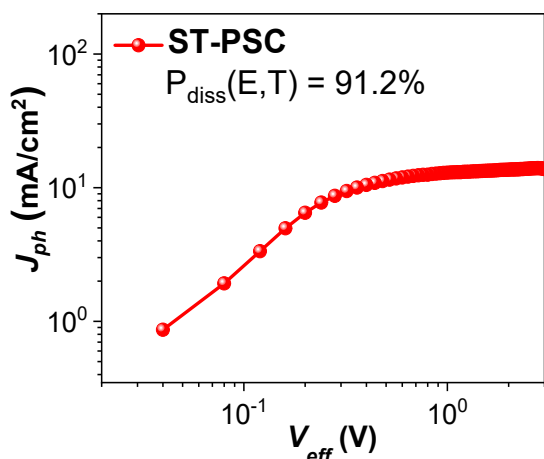

Figure S3.  $J_{ph}$  versus  $V_{eff}$  of ST-PSC.

## 6. Space charge limited current (SCLC) mobility measurements

Hole mobility was measured in a hole-only device composed of ITO/PEDOT:PSS/active layer/MoO<sub>3</sub>/Ag. The electron mobility was measured in an electron-only device composed of ITO/ZnO/active layer/PDINO/Ag. For the hole-only device, PEDOT:PSS was spin-coated on ITO at 4000 rpm for 30 s and thermal-annealed at 150 °C for 20 min. Chloroform solution of the blend were spin-coated at 3000 rpm for 30 s and baked at 110 °C for 10 min in a glove box. After that, MoO<sub>3</sub> (8 nm) and Ag (15 nm) were successively vacuum-deposited on the active layers. For the electron-only device, sol-gel ZnO was spin-coated onto the ITO-coated glass at a spinning rate of 4000 rpm for 40 s, followed by thermal annealing at 150 °C for 20 min. Chloroform solution of the blend was spin-coated on the layer of ZnO (40 nm) in a glove box. After that, the ethanol solution of PDINO was spin-coated at 3000 rpm for 25 s. Finally, Ag (15 nm) was vacuum-deposited on top of the PDINO film (5 nm).

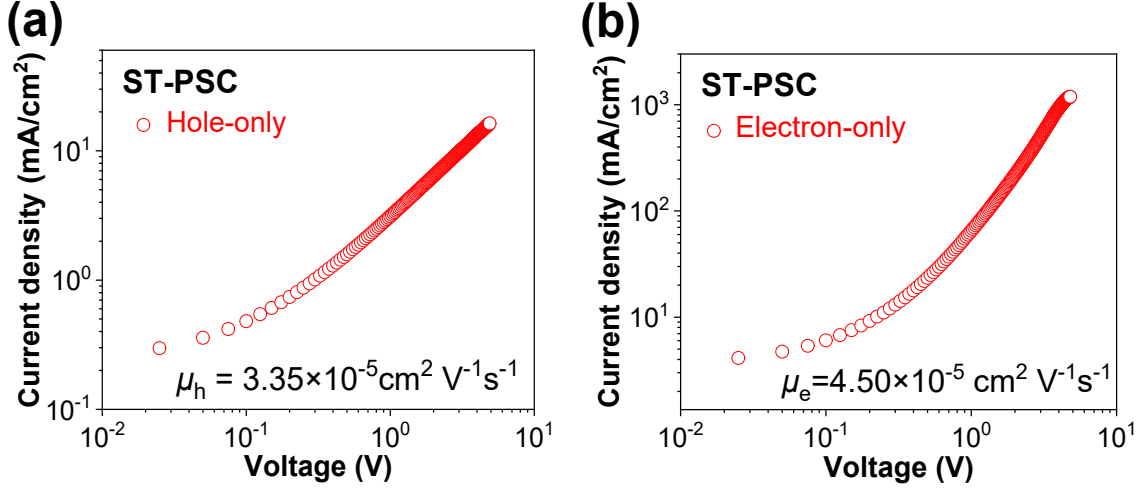

**Figure S4.** (a) Current density–voltage curves of the hole-only device with the structure of ITO/PEDOT:PSS (40 nm)/PBDB-TF-T10:Y6/MoO<sub>3</sub>(8 nm)/Ag(15 nm). (b) Current density–voltage curves of the electron-only device with the structure of ITO/ZnO (40 nm)/PBDB-TF-T10:Y6/PDINO (5 nm)/Ag (15 nm).

According to the Murgatroyd law and using the Equation (S1) to fit the trap-filled region of the  $J$ – $V$  curves from the single carrier devices, SCLC mobilities was calculated in a precise way.<sup>2</sup>

$$J = \frac{9}{8} \varepsilon_r \varepsilon_0 \mu \frac{(V - V_{bi})^2}{L^3} \exp\left(\frac{0.89}{KT} \gamma \left(\frac{\sqrt{V - V_{bi}}}{\sqrt{L}}\right)\right) \quad (\text{S1})$$

where  $J$  is the current density,  $\varepsilon_r$  is the relative dielectric constant of the polymer blend ( $\varepsilon_r = 3.6$ ),  $\varepsilon_0$  is the free-space dielectric constant,  $\mu$  is the temperature-dependent mobilities at zero field,  $L$  is the thickness of the active layer,  $V - V_{bi}$  is the effective voltage,  $k$  is Boltzmann constant,  $T$  is the absolute temperature and  $\gamma$  is the field enhancement factor.

## 7. Charge recombination characterization

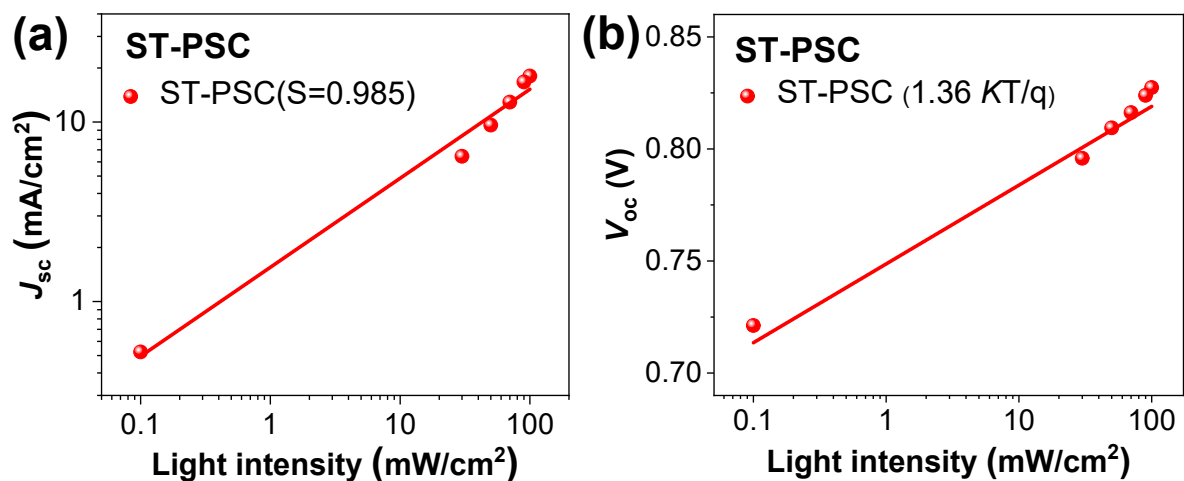

Figure S5. Light intensity dependence of (a)  $J_{sc}$  and (b)  $V_{oc}$  of ST-PSCs.

## 8. $J$ - $V$ curves of large-area PSCs

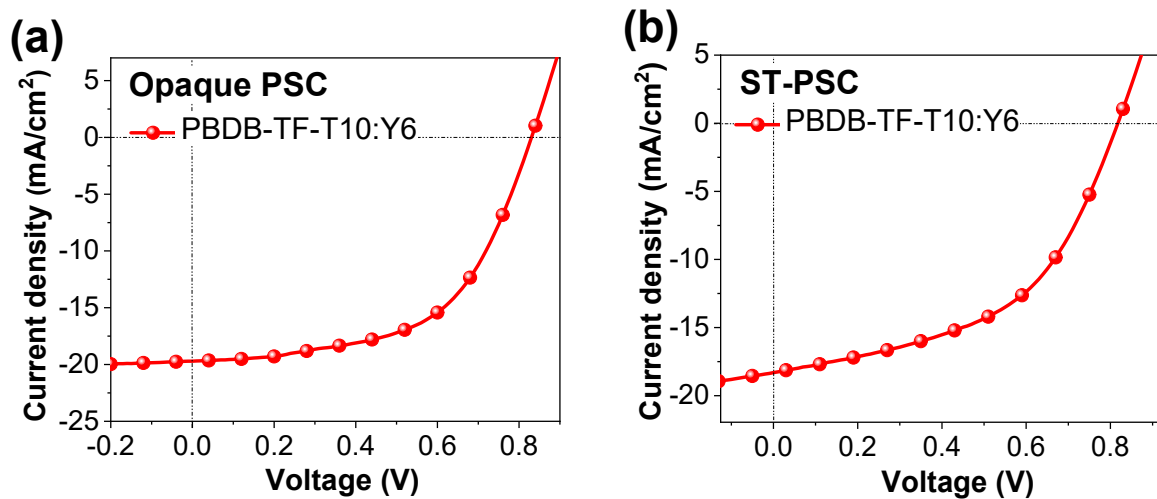

Figure S6.  $J$ - $V$  curves of large-area PSCs.

## 9. CIE chromaticity diagram

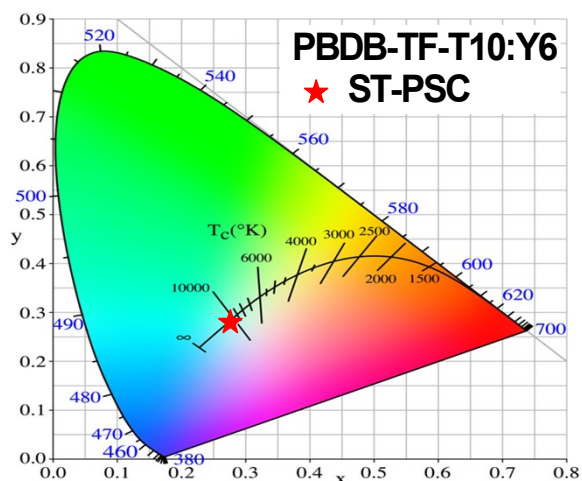

Figure S7. A CIE chromaticity diagram exhibiting color coordinates of ST-PSC.

## 10. Absorption spectra of photosynthetic pigments

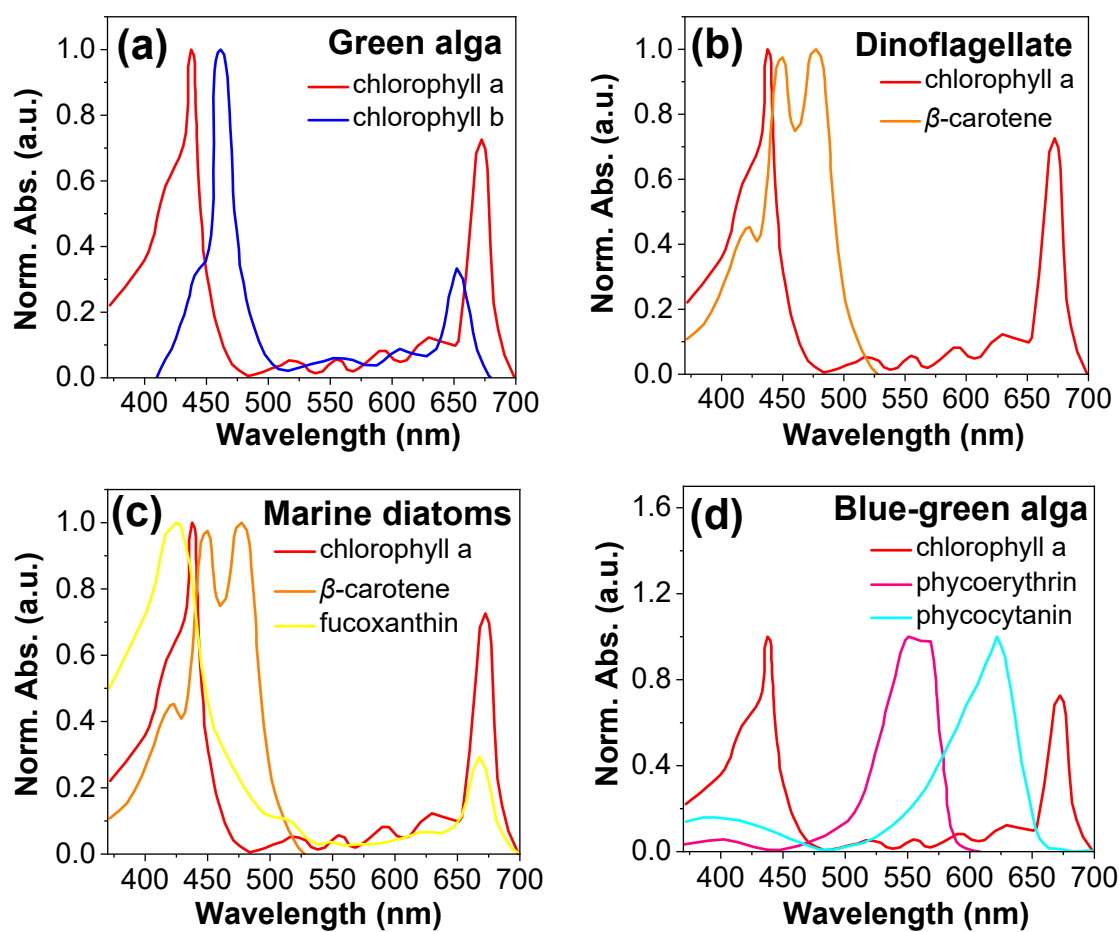

Figure S8. Absorbance spectra of photosynthetic pigments in the algae selected in this study.



## 11. Absorption spectrum of photosynthetic pigments in *Chlorella sp.*

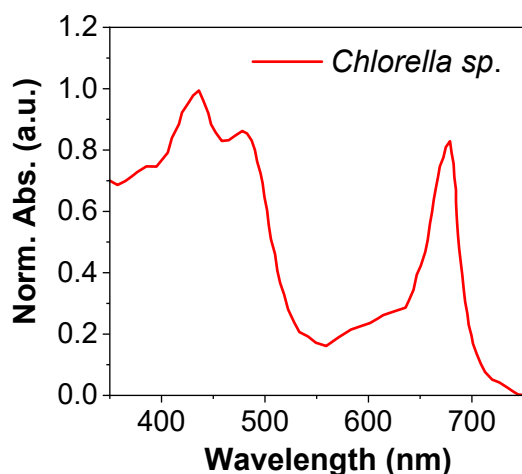

**Figure S9.** An absorption spectrum of photosynthetic pigments extracted from *Chlorella sp.*.

## 12. Summary of photosynthetic parameters

**Table S1.** Summary of  $F_v/F_m$  of the four algae under different shading conditions.

| algae                              | conditions | $F_v/F_m$<br>(initial time) | $F_v/F_m$<br>(middle time) | $F_v/F_m$<br>(final time) | $F_v/F_m$<br>of<br><i>Chlorella sp.</i><br>were<br>record<br>ed at 0<br>h, 36 h<br>and<br>72h;<br>$F_v/F_m$<br>of <i>A. carterae</i><br>were<br>record<br>ed at 0 |
|------------------------------------|------------|-----------------------------|----------------------------|---------------------------|-------------------------------------------------------------------------------------------------------------------------------------------------------------------|
| <i>Chlorella sp.</i> <sup>a</sup>  | Control    |                             | 0.60                       | 0.62                      |                                                                                                                                                                   |
|                                    | ST-PSC     | 0.68                        | 0.65                       | 0.68                      |                                                                                                                                                                   |
|                                    | PSC        |                             | 0.67                       | 0.70                      |                                                                                                                                                                   |
| <i>A. carterae</i> <sup>b</sup>    | Control    |                             | 0.59                       | 0.62                      |                                                                                                                                                                   |
|                                    | ST-PSC     | 0.66                        | 0.59                       | 0.66                      |                                                                                                                                                                   |
|                                    | PSC        |                             | 0.67                       | 0.69                      |                                                                                                                                                                   |
| <i>P. tricornutum</i> <sup>c</sup> | Control    |                             | 0.62                       | 0.62                      | $F_v/F_m$<br>of <i>A. carterae</i><br>were<br>record<br>ed at 0                                                                                                   |
|                                    | ST-PSC     | 0.57                        | 0.66                       | 0.67                      |                                                                                                                                                                   |
|                                    | PSC        |                             | 0.66                       | 0.68                      |                                                                                                                                                                   |
| <i>Synechococcus</i> <sup>d</sup>  | Control    |                             | 0.34                       | 0.38                      |                                                                                                                                                                   |
|                                    | ST-PSC     | 0.32                        | 0.22                       | 0.29                      |                                                                                                                                                                   |
|                                    | PSC        |                             | 0.32                       | 0.35                      |                                                                                                                                                                   |

h, 40 h and 80 h;

<sup>c</sup> $F_v/F_m$  of *P. tricornutum* were recorded at 0 h, 48 h and 96 h;

<sup>d</sup> $F_v/F_m$  of *Synechococcus* were recorded at 0 h, 60 h and 120 h.

### 13. Flow cytometric dot-plots of *Synechococcus*

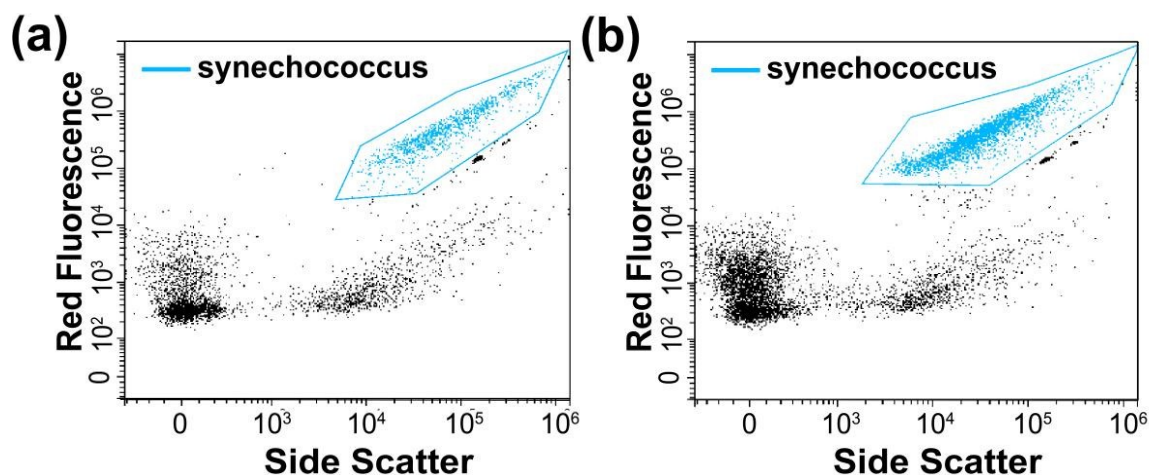

Figure S10. Flow cytometric dot-plots of *Synechococcus* under ST-PSCs at (a) 0 h and (b) 120 h.

### 14. $J$ - $V$ curves of integrated ST-PSCs

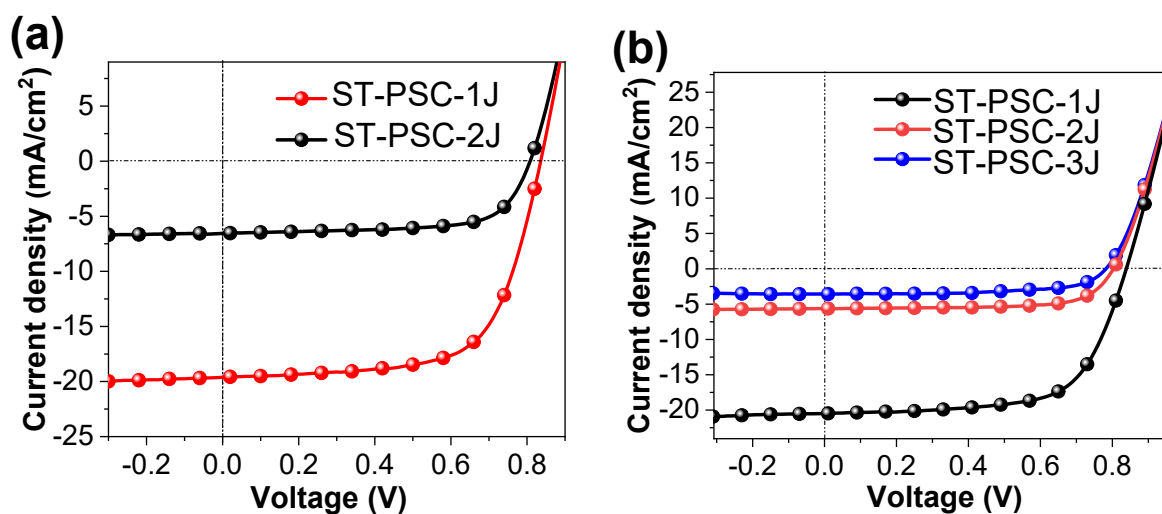

Figure S11.  $J$ - $V$  curves of integrated ST-PSCs based on (a) two junctions and (b) three junctions.

### 15. Reference

1. Y. Xu, Q. Ji, L. Yin, N. Zhang, T. Liu, N. Li, X. He, G. Wen, W. Zhang, L. Yu, P. Murto and X. Xu, *ACS Appl. Mater. Interfaces*, 2021, **13**, 23993–24004.
2. N. Felekidis, A. Melianas and M. Kemerink, *ACS Appl. Mater. Interfaces*, 2017, **9**, 37070–37077.
